# Supplementary material for: Culture-Independent Genotyping Improves Surveillance of Neisseria gonorrhoeae, Especially in Oropharyngeal Samples, the Netherlands, 2017 to 2018
Source: MDPI journal article supplement (doi:10.3390/pathogens11111344), 2022-11-14
Supplement: s1 [file s1]

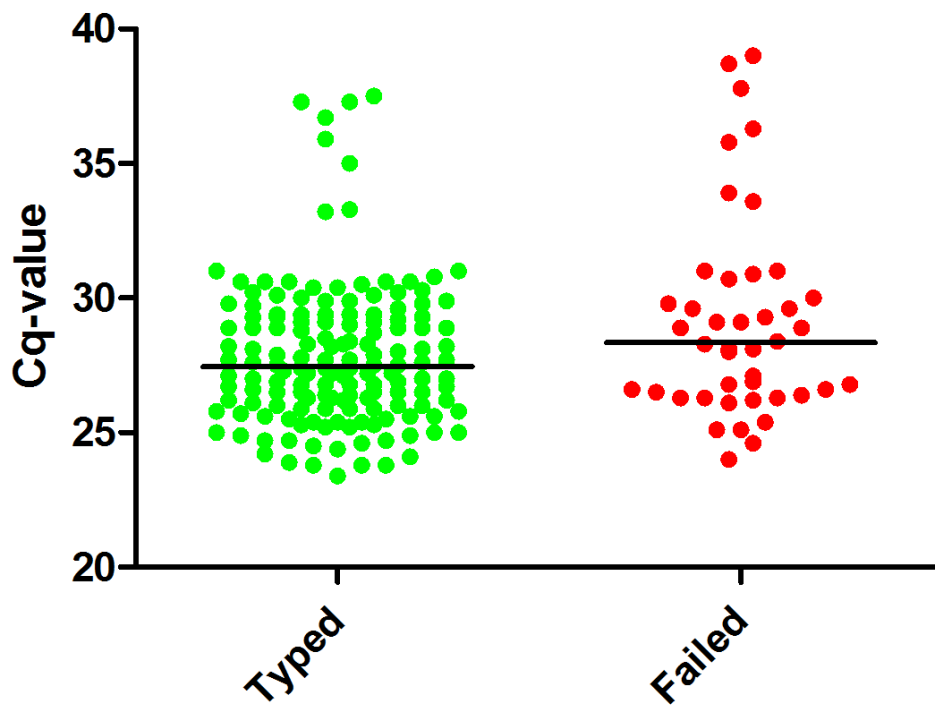

**Supplementary Figure S1.** Overview of the Cq-values of the original NAAT of the typed and failed samples. Median Cq value of the typed samples is 27 and 28 of the failed samples,  $p = 0.046$  (Mann-Whitney U-test ( $W = 2681.5$ ,  $N = 196$ )).
